# Supplementary material for: Glucocorticoids promote structural and functional maturation of foetal cardiomyocytes: a role for PGC-1α
Source: Springer Nature journal article supplement (doi:10.1038/cdd.2014.181), 2014-10-31
Supplement: 41418_2015_BFcdd2014181_MOESM3_ESM.pdf [file 41418_2015_BFcdd2014181_MOESM3_ESM.pdf]

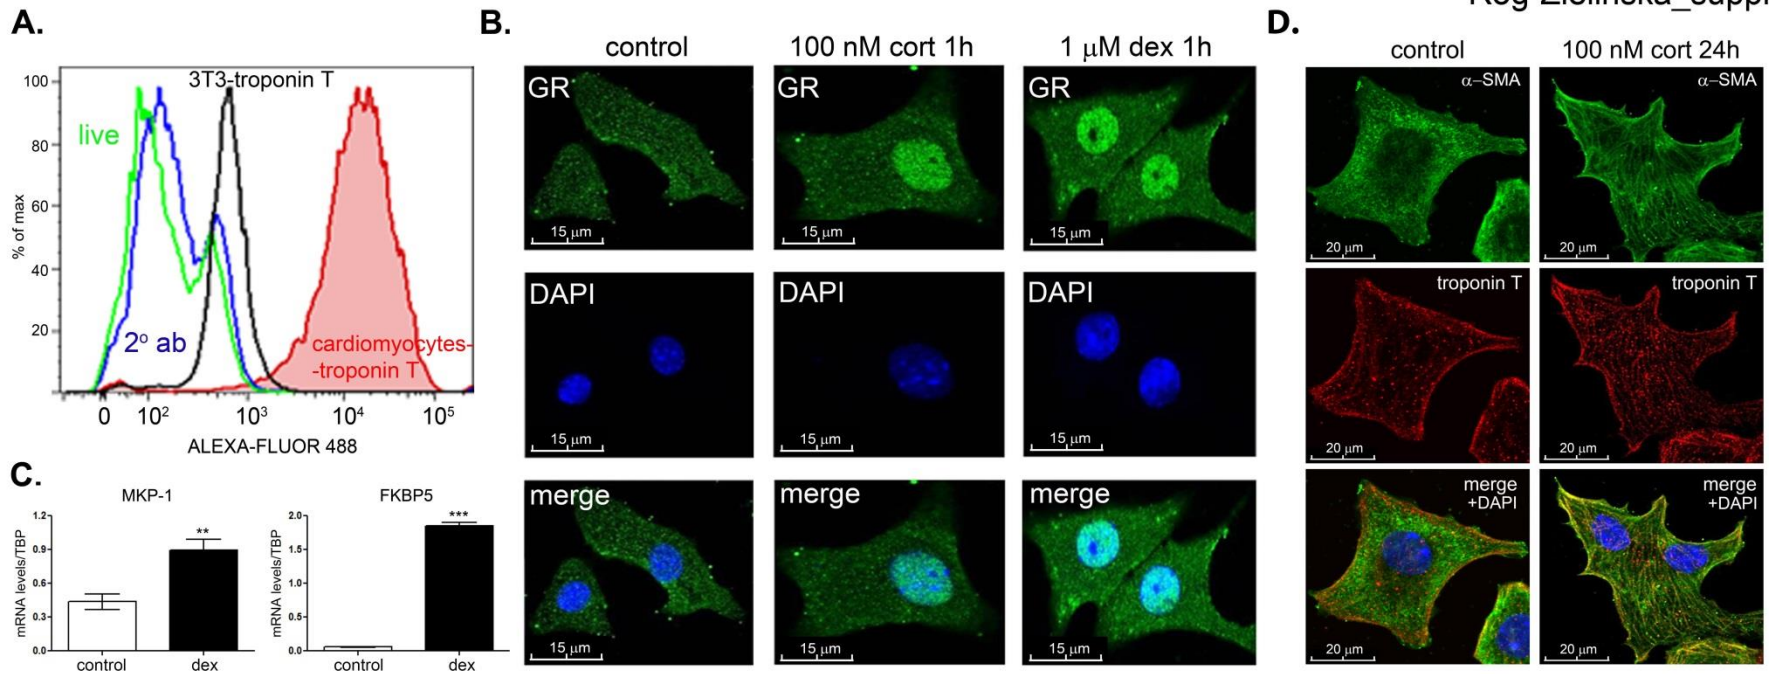

**Supplementary figure 1. (A)** Purity of primary foetal C57BL/6 mouse cardiomyocytes was assessed using a BD LSR Fortessa flow cytometer following labelling with anti-troponin T antibody (Abcam; Cambridge, UK) and fluorophore-conjugated secondary antibody (Alexa488, Invitrogen; Paisley, UK); undifferentiated 3T3-L1 (preadipocyte) cells were used as a negative control. Troponin T-positive cardiomyocytes are shown in red; 3T3-L1 cells stained with troponin-T and used as a negative control are shown in black. Live cells are shown in blue and cells stained with secondary antibody only, in green. Troponin T-positive cardiomyocytes represented 98% of total cells recovered from foetal hearts. **(B)** GR translocates to the nucleus of primary murine cardiomyocytes following 1 h treatment with 100 nM corticosterone or 1  $\mu$ M dexamethasone. Cells were stained with anti-GR antibody (green) and DAPI (nuclear counterstain, blue); images were captured using a confocal microscope and are representative of  $n=5$  (replicates). **(C)** Levels of mRNA encoding MKP-1 (*Dusp-1*) and FKBP5, known GR targets, were increased in primary cardiomyocytes following treatment with 1  $\mu$ M dexamethasone for 24 h. Data were analysed by Student's *t*-test; \*\* $p<0.01$ , \*\*\* $p<0.001$ ,  $n=3$  replicates. **(D)** Corticosterone induced the formation of troponin T-associated  $\alpha$ -smooth muscle actin fibers in primary foetal cardiomyocytes. Cells were treated with 100 nM corticosterone for 24 h, fixed and stained for  $\alpha$ -smooth muscle actin ( $\alpha$ -SMA, green) and troponin T (red). DAPI (blue) was used as a nuclear counterstain. Bottom panel shows merged images. Images representative of  $n=12$  replicates over two independent experiments.

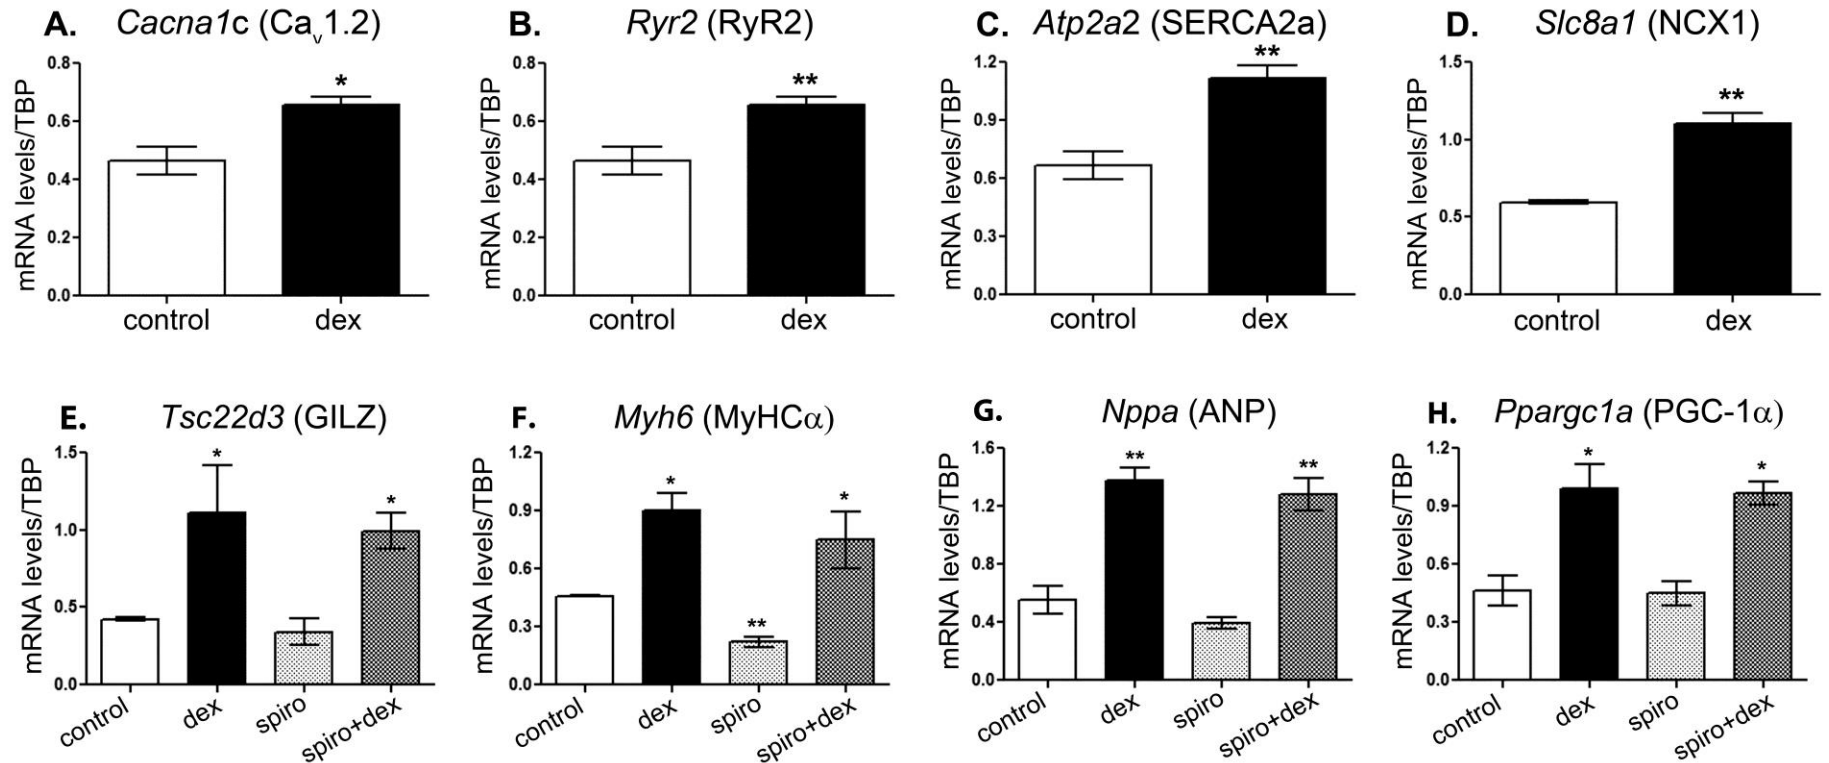

**Supplementary figure 2. (A-D)** Dexamethasone treatment (1  $\mu$ M, 24 h) of primary cardiomyocytes induced mRNAs encoding proteins involved in calcium handling. Data were analysed by Student's *t*-test; \* $p$ <0.05, \*\* $p$ <0.01;  $n$ =3 replicates. **(E-H)** Pre-treatment of primary foetal cardiomyocytes with the mineralocorticoid receptor antagonist, spironolactone (spiro, 30 min, 10  $\mu$ M) had no effect on dexamethasone (1  $\mu$ M, 16 h) induction of mRNAs encoding GILZ, MyHC $\alpha$ , ANP and PGC-1 $\alpha$ . Data were analysed by one-way ANOVA with Bonferroni's *post-hoc* test; \* $p$ <0.05, \*\* $p$ <0.01 vs control;  $n$ =4 replicates.

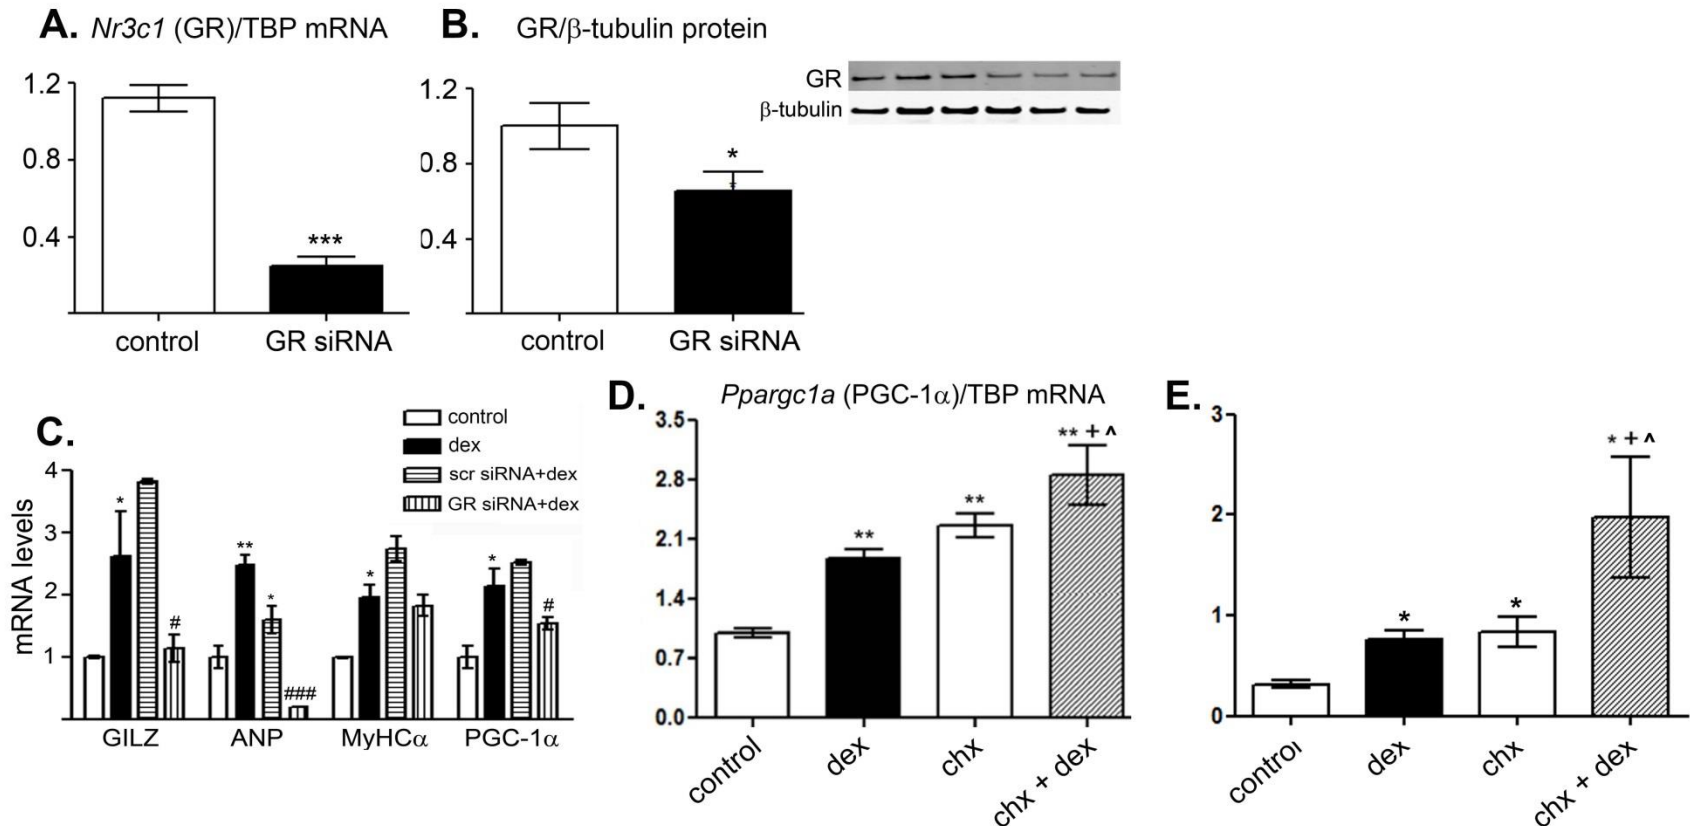

**Supplementary figure 3.** Transfection with GR siRNA reduced GR mRNA (A) and protein levels (B) in primary foetal cardiomyocytes. Data were analysed by *t*-test; \* $p < 0.05$ , \*\*\* $p < 0.001$ ;  $n = 7$  replicates over 2 independent experiments. (C) GR siRNA attenuated the dexamethasone induction of mRNAs encoding GILZ, ANP, MyHC $\alpha$  and PGC-1 $\alpha$  but transfection with scrambled siRNA (scr siRNA) for 40 h prior to glucocorticoid treatment did not impair dexamethasone induction of these mRNAs. Data were analysed by one-way ANOVA with Bonferroni's *post-hoc* test; \* $p < 0.05$ , \*\* $p < 0.01$ ;  $n = 6-8$  replicates of two independent experiments. (D-E) Dexamethasone (100 nM) increases *Ppargc1a* mRNA levels after 2h (D) and 8h (E) in primary foetal cardiomyocytes, effect that is not abolished by pre-treatment with cycloheximide. Data were analysed by one-way ANOVA with Bonferroni's *post-hoc* test; \* $p < 0.05$ , \*\* $p < 0.01$  vs control, + $p < 0.05$  vs dex, ^ $p < 0.05$  vs chx;  $n = 3$  replicates.

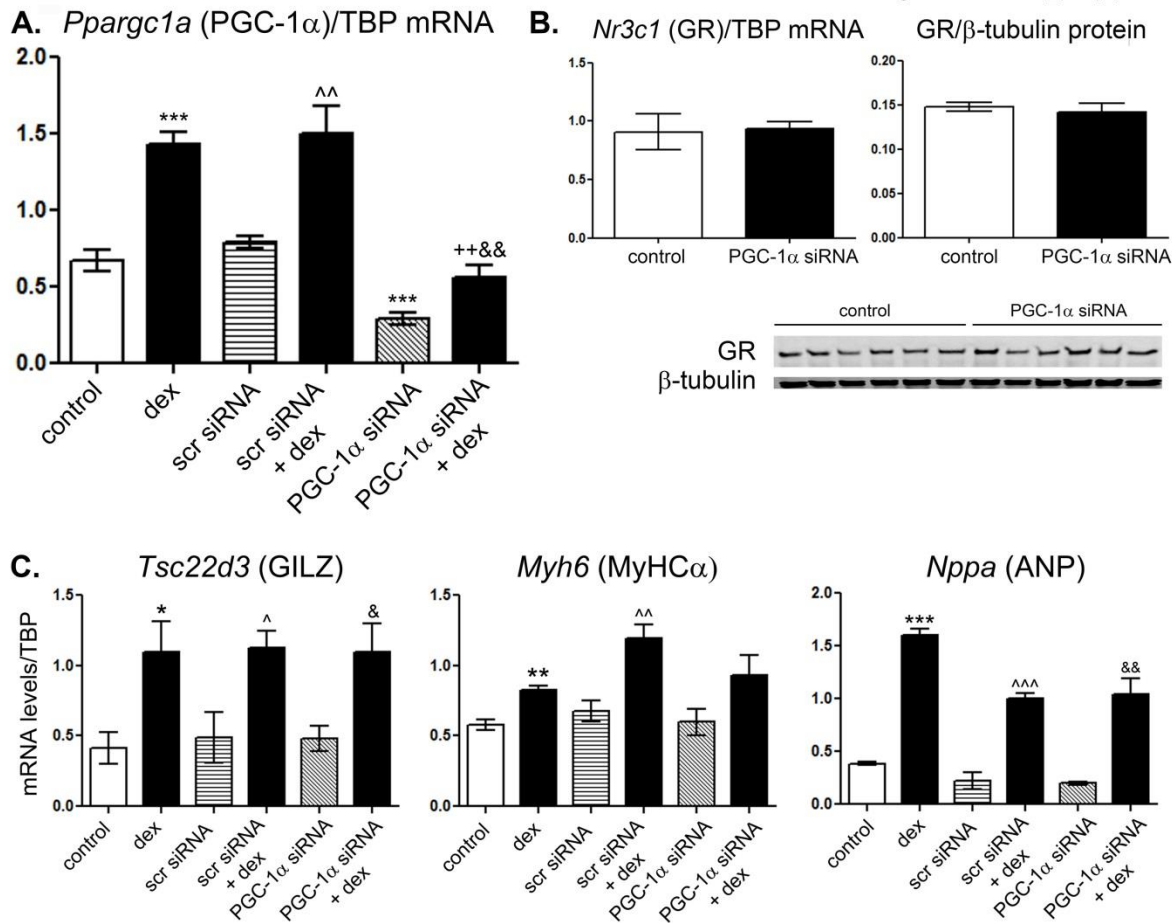

**Supplementary figure 4.** (A) Transfection with PGC-1 $\alpha$  siRNA reduced PGC-1 $\alpha$  mRNA levels in primary foetal cardiomyocytes whereas scrambled (scr) siRNA had no effect. Data were analysed by one-way ANOVA with Bonferroni's *post-hoc* test; \*\*/++/^/&&p<0.01, \*\*\*p<0.001; \*vs untreated control, +vs dex, ^vs scrambled siRNA, &vs PGC-1 $\alpha$  siRNA; n=6-8 replicates of two independent experiments. (B) Transfection with PGC-1 $\alpha$  siRNA did not affect mRNA or protein levels of GR. (C) siRNA-mediated knock down of PGC-1 $\alpha$  does not impair transcriptional responses to dexamethasone in primary foetal cardiomyocytes. Cells were treated with 1  $\mu$ M dexamethasone for 16 h. To block PGC-1 $\alpha$  -mediated effects, cells were transfected with PGC-1 $\alpha$  siRNA 40 h prior to glucocorticoid treatment. Data were analysed by one-way ANOVA with Bonferroni's *post-hoc* test; \*/^/&p<0.05, \*\*/^/&p<0.01, \*\*\*/^^p<0.001; \*vs untreated control, ^vs scrambled siRNA, &vs PGC-1 $\alpha$  siRNA; n=3 replicates.

## Rog-Zielinska\_suppl 5

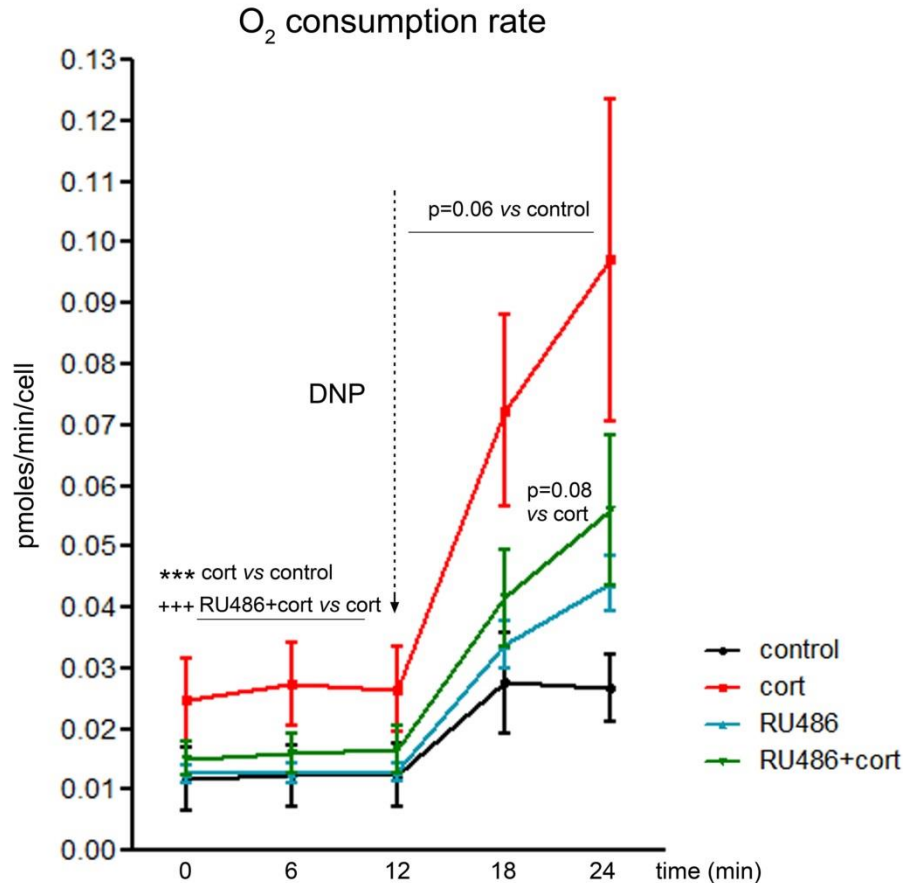

**Supplementary figure 5.** Glucocorticoids increase mitochondrial respiration in primary foetal cardiomyocytes in a GR-dependent manner. Real-time oxygen consumption rate (OCR) was measured in untreated (control) cardiomyocytes or following treatment with 100 nM corticosterone for 24 h (cort). To test mitochondrial reserve, 2,4-DNP was added to acutely uncouple ATP synthesis from respiration. Cells were pre-treated with RU486 (1  $\mu$ M, 30 min). Data were analysed by one-way ANOVA with Bonferroni's *post-hoc* test (first 3 time points), and the area under the curve (AUC) was measured for subsequent readouts; \*\*\* $p < 0.001$  vs control, +++ $p < 0.001$  vs cort;  $n = 5$  replicates.
